# Supplementary material for: Decrease in multiple complement proteins associated with development of islet autoimmunity and type 1 diabetes
Source: PubMed Central journal article supplement — iScience. 2023 Dec 20;27(2):108769. doi: 10.1016/j.isci.2023.108769 (PMC10831269; doi:10.1016/j.isci.2023.108769), 2023-12-20
Supplement: mmc1.pdf [file mmc1.pdf]

**Supplemental information**

**Decrease in multiple complement proteins**

**associated with development of islet**

**autoimmunity and type 1 diabetes**

**Bobbie-Jo M. Webb-Robertson, Ernesto S. Nakayasu, Fran Dong, Kathy C. Waugh, Javier E. Flores, Lisa M. Bramer, Athena A. Schepmoes, Yuqian Gao, Thomas L. Fillmore, Suna Onengut-Gumuscu, Ashley Frazer-Abel, Stephen S. Rich, V. Michael Holers, Thomas O. Metz, and Marian J. Rewers**

**Table S1. SRM Statistics for Pre-IA comparison to control.** As described in the STAR Methods, Quantification and Statistical Analysis section, P-value and effect size is based on a linear mixed model comparing the difference of SRM protein abundance between CTRL and the data Pre-IA, adjusting for sex, HLA group, and first-degree relative status with a nested random effect for subject and plate number. The average log<sub>2</sub> abundance values of all Pre-IA and control samples for each subject within the age range was used to compute log<sub>2</sub> fold-changes.

|      | P-Value | Effect Size | Log2 Fold-Change (Age Ranges) |         |         |         |         |
|------|---------|-------------|-------------------------------|---------|---------|---------|---------|
|      |         |             | <3                            | [3,6)   | [6,9)   | [9,12)  | >12     |
| MBL2 | 0.241   | 0.248       | 0.5224                        | 0.1110  | 0.3067  | 0.4596  | 0.4918  |
| C1q  | 0.057   | -0.162      | -0.2354                       | -0.2341 | 0.0345  | 0.0539  | 0.1055  |
| C1r  | 0.001   | -0.107      | -0.1717                       | -0.1390 | -0.1201 | -0.0528 | -0.1229 |
| C1s  | 0.003   | -0.089      | -0.1258                       | -0.1502 | -0.1187 | -0.0237 | -0.0463 |
| C2   | 0.084   | -0.074      | -0.1059                       | -0.0939 | -0.1272 | -0.1107 | -0.0678 |
| C4a  | 0.003   | -0.268      | -0.3088                       | -0.2097 | -0.0891 | -0.1406 | 0.3072  |
| C4b  | 0.006   | -0.247      | -0.1986                       | -0.2122 | -0.0629 | -0.1806 | 0.3112  |
| CFB  | 0.294   | -0.062      | -0.2028                       | -0.0617 | -0.1147 | -0.0202 | 0.2958  |
| PROP | 0.431   | -0.139      | 0.0130                        | -0.2195 | -0.6270 | -0.4097 | -0.4866 |
| C5   | 0.187   | -0.076      | -0.3015                       | 0.0042  | -0.1279 | -0.1928 | 0.0520  |
| C6   | 0.025   | -0.112      | -0.1623                       | -0.1123 | -0.1073 | -0.0216 | 0.0827  |
| C7   | 0.083   | -0.160      | -0.5479                       | -0.0665 | -0.1592 | -0.0744 | 0.0855  |
| C8a  | 0.080   | -0.089      | -0.1667                       | -0.1177 | -0.0595 | -0.0408 | 0.0615  |
| C8b  | 0.212   | -0.069      | -0.0807                       | -0.0763 | -0.1084 | -0.1292 | 0.2606  |
| C8g  | 0.159   | 0.140       | 0.2765                        | -0.0276 | 0.2400  | -0.0335 | 0.1179  |
| C9   | 0.488   | -0.052      | -0.3856                       | -0.0438 | -0.0132 | -0.0718 | 0.3192  |
| C3   | 0.034   | -0.095      | -0.1251                       | -0.0996 | -0.0779 | -0.0113 | 0.0462  |
| CFI  | 0.084   | -0.060      | -0.1264                       | -0.0867 | -0.0814 | -0.0495 | 0.1183  |
| CFH  | 0.146   | -0.051      | -0.1504                       | -0.0093 | -0.1930 | -0.1706 | 0.0215  |

**Table S2. SRM Statistics for Post-IA comparison to control.** As described in the STAR Methods, Quantification and Statistical Analysis section, P-value and effect size is based on a linear mixed model comparing the difference of SRM protein abundance between CTRL and the data Post-IA, adjusting for sex, HLA group, and first-degree relative status with a nested random effect for subject and plate number. The average log<sub>2</sub> abundance values of all Pre-IA and control samples for each subject within the age range was used to compute log<sub>2</sub> fold-changes.

|      | P-Value | Effect Size | Log2 Fold-Change (Age Ranges) |         |         |         |         |
|------|---------|-------------|-------------------------------|---------|---------|---------|---------|
|      |         |             | <3                            | [3,6)   | [6,9)   | [9,12)  | >12     |
| MBL2 | 0.156   | 0.2399      | 0.3234                        | 0.2856  | 0.3140  | -0.0148 | 0.5210  |
| C1q  | 0.019   | -0.1558     | -0.0942                       | -0.1599 | -0.1814 | -0.1205 | -0.1095 |
| C1r  | 0.004   | -0.0921     | -0.1144                       | -0.0914 | -0.0977 | -0.1182 | -0.1151 |
| C1s  | 0.001   | -0.1084     | -0.0776                       | -0.1467 | -0.1455 | -0.1122 | -0.1080 |
| C2   | 0.014   | -0.0812     | -0.0373                       | -0.1394 | -0.1375 | -0.0442 | -0.0479 |
| C4a  | 0.013   | -0.1766     | -0.0814                       | -0.1533 | -0.1021 | -0.0854 | -0.0347 |
| C4b  | 0.041   | -0.1606     | -0.0223                       | -0.1867 | -0.1043 | -0.0714 | 0.0035  |
| CFB  | 0.156   | -0.0703     | -0.0699                       | -0.0676 | -0.0714 | -0.0513 | -0.0807 |
| PROP | 0.698   | 0.0516      | 0.4478                        | 0.1331  | -0.0439 | -0.0560 | -0.2041 |
| C5   | 0.011   | -0.1317     | -0.1586                       | -0.1739 | -0.1420 | -0.2142 | 0.0012  |
| C6   | 0.001   | -0.1349     | -0.1266                       | -0.1738 | -0.1259 | -0.0832 | -0.1547 |
| C7   | 0.137   | -0.1089     | -0.6289                       | -0.0158 | 0.0184  | -0.2436 | -0.0330 |
| C8a  | 0.028   | -0.0881     | -0.0902                       | -0.1279 | -0.0607 | -0.0635 | -0.0973 |
| C8b  | 0.045   | -0.1037     | -0.0694                       | -0.2258 | -0.1597 | -0.1056 | 0.0555  |
| C8g  | 0.837   | -0.0164     | -0.0229                       | -0.0913 | -0.0449 | -0.0830 | 0.0661  |
| C9   | 0.280   | -0.0620     | -0.0779                       | -0.1026 | -0.1011 | -0.0401 | 0.0117  |
| C3   | 0.007   | -0.1036     | -0.0549                       | -0.1643 | -0.1348 | -0.0551 | -0.1085 |
| CFI  | 0.107   | -0.0520     | -0.0085                       | -0.0688 | -0.0688 | 0.0068  | -0.0788 |
| CFH  | 0.018   | -0.0898     | -0.1293                       | -0.0922 | -0.1225 | -0.0876 | -0.0135 |

**Table S3. Exsera Statistics for Pre-IA comparison to control.** As described in the STAR Methods, Quantification and Statistical Analysis section, P-value and effect size is based on a linear mixed model comparing the difference of Exsera protein abundance between CTRL and the data Pre-IA, adjusting for sex, HLA group, and first-degree relative. The average log2 abundance values of all Pre-IA and control samples for each subject within the age range was used to compute log2 fold-changes.

|      | P-Value | Effect Size | Log2 Fold-Change (Age Ranges) |         |         |         |         |
|------|---------|-------------|-------------------------------|---------|---------|---------|---------|
|      |         |             | <3                            | [3,6)   | [6,9)   | [9,12)  | >12     |
| MBL2 | 0.025   | 0.812       | 0.5624                        | 0.7268  | 0.9747  | 0.4303  | -0.5290 |
| C1q  | 0.839   | -0.016      | -0.0750                       | 0.0548  | 0.0611  | -0.0274 | 0.2499  |
| C2   | 0.375   | -0.223      | -0.3005                       | -0.2105 | -0.5097 | -0.6208 | 0.5873  |
| C4   | 0.147   | -0.121      | -0.1380                       | -0.0393 | 0.0849  | 0.0469  | 0.4764  |
| C4b  | 0.961   | -0.008      | -0.0796                       | 0.1354  | 0.3403  | 0.4579  | 1.2143  |
| CFB  | 0.457   | 0.042       | -0.0295                       | 0.0387  | 0.0255  | -0.0147 | 0.5161  |
| CFD  | 0.548   | 0.041       | 0.1109                        | -0.0274 | -0.0607 | 0.0768  | 0.0068  |
| PROP | 0.322   | -0.045      | -0.0600                       | -0.0373 | -0.0704 | -0.0637 | 0.1225  |
| C5   | 0.049   | -0.166      | -0.1460                       | -0.2055 | -0.2717 | -0.1004 | 0.0615  |
| C5a  | 0.015   | -0.870      | -0.6220                       | -0.9313 | -1.5790 | -1.5748 | -1.3607 |
| C5b  | 0.001   | -0.306      | -0.3022                       | -0.1490 | -0.5107 | -0.3833 | 0.1621  |
| C3   | 0.000   | -0.693      | -0.3802                       | -0.6167 | -1.1095 | -0.7525 | 0.0311  |
| C3a  | 0.003   | -0.370      | -0.4002                       | -0.5084 | -0.4000 | -0.2470 | 0.6287  |
| C3b  | 0.000   | -0.980      | -0.7252                       | -0.9002 | -1.2046 | -0.4898 | 0.7396  |
| CFI  | 0.803   | 0.012       | -0.1788                       | 0.0551  | 0.0636  | 0.0168  | 0.2295  |
| CFH  | 0.960   | 0.002       | -0.0458                       | 0.0148  | -0.0206 | -0.0224 | 0.2705  |

**Table S4. Exsera Statistics for Post-IA comparison to control.** As described in the STAR Methods, Quantification and Statistical Analysis section, P-value and effect size is based on a linear mixed model comparing the difference of Exsera protein abundance between CTRL and the data Post-IA, adjusting for sex, HLA group, and first-degree relative. The average log2 abundance values of all Pre-IA and control samples for each subject within the age range was used to compute log2 fold-changes.

|      | P-Value | Effect Size | Log2 Fold-Change (Age Ranges) |         |         |         |         |
|------|---------|-------------|-------------------------------|---------|---------|---------|---------|
|      |         |             | <3                            | [3,6)   | [6,9)   | [9,12)  | >12     |
| MBL2 | 0.009   | 0.785       | 0.6353                        | 0.2483  | 0.6286  | 0.7061  | 0.5308  |
| C1q  | 0.495   | -0.035      | 0.0250                        | 0.0339  | -0.0403 | 0.0025  | 0.0549  |
| C2   | 0.419   | -0.186      | -0.6146                       | -0.1645 | -0.3836 | -0.1518 | 0.4128  |
| C4   | 0.731   | -0.024      | 0.0288                        | 0.0488  | 0.0237  | 0.0544  | 0.1346  |
| C4b  | 0.599   | -0.064      | -0.1940                       | -0.0481 | -0.1478 | 0.0064  | 0.1773  |
| CFB  | 0.968   | 0.002       | 0.0253                        | 0.0354  | 0.0163  | 0.0425  | 0.0193  |
| CFD  | 0.809   | -0.015      | -0.0179                       | -0.0452 | -0.0262 | 0.0220  | 0.1259  |
| PROP | 0.496   | -0.030      | 0.0393                        | 0.0215  | -0.0602 | 0.0192  | 0.0047  |
| C5   | 0.168   | -0.101      | 0.0722                        | -0.0429 | -0.0297 | -0.0759 | -0.0303 |
| C5a  | 0.042   | -0.586      | -0.0506                       | -0.2828 | 0.0232  | -0.2557 | -0.5014 |
| C5b  | 0.018   | -0.189      | -0.2138                       | -0.1417 | -0.3615 | -0.1179 | -0.0922 |
| C3   | 0.014   | -0.375      | -0.3590                       | -0.6522 | -0.8530 | -0.1941 | -0.1310 |
| C3a  | 0.042   | -0.203      | -0.3821                       | -0.4990 | -0.1902 | -0.0977 | 0.1583  |
| C3b  | 0.075   | -0.412      | -0.6937                       | -0.7346 | -1.0911 | 0.0004  | 0.4066  |
| CFI  | 0.069   | -0.077      | -0.1025                       | -0.0935 | -0.0966 | -0.0318 | -0.0088 |
| CFH  | 0.758   | -0.013      | -0.0251                       | -0.0164 | -0.0220 | 0.0242  | 0.0307  |
